# Supplementary material for: CEDAR-GPP: spatiotemporally upscaled estimates of gross primary productivity incorporating CO 2 fertilization
Source: Copernicus journal article supplement (doi:10.5194/essd-2023-337), 2023-10-05
Supplement: Supplementary file 1 [file essd-2023-337-supplement.pdf]

## **Supplementary Information for**

CEDAR-GPP: spatiotemporally upscaled estimates of gross primary productivity  
incorporating CO<sub>2</sub> fertilization

Yanghui Kang<sup>1,2</sup>, Max Gaber<sup>1,3</sup>, Maoya Bassiouni<sup>1,2</sup>, Xinchun Lu<sup>1,2</sup>, Trevor F. Keenan<sup>1,2</sup>

<sup>1</sup> Department of Environmental Science, Policy, and Management, University of California,  
Berkeley, Berkeley, CA 94720, USA

<sup>2</sup> Climate and Ecosystem Sciences Division, Lawrence Berkeley National Laboratory, Berkeley, CA  
94720, USA

<sup>3</sup> Department of Geosciences and Natural Resource Management, University of Copenhagen,  
Copenhagen, 1350, Denmark.

### **This PDF file includes:**

Table S1 to S2

Figure S1 to S5

SI References

Table S1. List of predictors used in different temporal model setup.

| Name                                                 | Source/Dataset                                            | Unit                                                 | Used in    |           |
|------------------------------------------------------|-----------------------------------------------------------|------------------------------------------------------|------------|-----------|
|                                                      |                                                           |                                                      | Short-term | Long-term |
| Air temperature                                      | ERA5-Land                                                 | K                                                    | ✓          | ✓         |
| Skin temperature                                     |                                                           | K                                                    | ✓          | ✓         |
| Precipitation                                        |                                                           | m                                                    | ✓          | ✓         |
| Precipitation 3-month lag                            |                                                           | m                                                    | ✓          | ✓         |
| VPD                                                  |                                                           | kPa                                                  | ✓          | ✓         |
| Potential ET                                         |                                                           | m                                                    | ✓          | ✓         |
| Surface downwelling solar radiation                  |                                                           | J/m <sup>2</sup>                                     |            | ✓         |
| Surface reflectance Band 1 (red)                     | MCD43C4                                                   | -                                                    | ✓          |           |
| Surface reflectance Band 2 (nir)                     |                                                           | -                                                    | ✓          |           |
| Surface reflectance Band 3 (blue)                    |                                                           | -                                                    | ✓          |           |
| Surface reflectance Band 4 (green)                   |                                                           | -                                                    | ✓          |           |
| Surface reflectance Band 5 (SWIR1)                   |                                                           | -                                                    | ✓          |           |
| Surface reflectance Band 6 (SWIR2)                   |                                                           | -                                                    | ✓          |           |
| Surface reflectance Band 7 (SWIR3)                   |                                                           | -                                                    | ✓          |           |
| Normalized Difference Vegetation Index (NDVI)        |                                                           | -                                                    | ✓          |           |
| kNDVI <sup>a</sup>                                   |                                                           | -                                                    | ✓          |           |
| Enhanced Vegetation Index (EVI)                      |                                                           | -                                                    | ✓          |           |
| Normalized Different Water Index (NDWI) <sup>b</sup> |                                                           | -                                                    | ✓          |           |
| CI <sub>Green</sub> <sup>c</sup>                     |                                                           | -                                                    | ✓          |           |
| NIRv <sup>d</sup>                                    |                                                           | -                                                    | ✓          |           |
| Percentage of snow cover                             |                                                           | %                                                    | ✓          |           |
| fPAR                                                 | MCD15A3H                                                  | -                                                    | ✓          |           |
| LAI                                                  | (after 2002/07)<br>MOD15A2H<br>(before 2002/07)           | -                                                    | ✓          |           |
| NDVI                                                 | GIMMS NDVI4g                                              | -                                                    |            | ✓         |
| LAI                                                  | GIMMS LAI4g                                               | -                                                    |            | ✓         |
| Daytime land surface temperature                     | MYD11A1<br>(after 2002/07)<br>MOD11A1<br>(before 2002/07) | K                                                    | ✓          |           |
| Nighttime land surface temperature                   |                                                           | K                                                    | ✓          |           |
| All-sky daily average SIF                            | CSIF                                                      | mW m <sup>-2</sup> nm <sup>-1</sup> sr <sup>-1</sup> | ✓          |           |
| Photosynthetic Active Radiation (PAR)                | BESS PAR                                                  | W/m <sup>2</sup>                                     | ✓          |           |
| Diffuse PAR                                          |                                                           | W/m <sup>2</sup>                                     | ✓          |           |
| Shortwave downwelling radiation                      |                                                           | W/m <sup>2</sup>                                     | ✓          |           |
| Soil moisture                                        | ESACCI Soil Moisture                                      | %                                                    | ✓          |           |
| Plant Function Type (one-hot encoding)               | MCD12Q1                                                   | -                                                    | ✓          | ✓         |

|                                           |                                    |     |                                                |                                 |
|-------------------------------------------|------------------------------------|-----|------------------------------------------------|---------------------------------|
| Climate zone (one-hot encoding)           | Koppen-Geiger                      | -   | ✓                                              | ✓                               |
| C4 vegetation percentage                  | ISLSCP II C4 Vegetation Percentage | %   | ✓ (only in ST_CFE-ML and ST_CFE-Hybrid setups) | ✓ (only in LT_CFE-Hybrid setup) |
| Atmospheric CO <sub>2</sub> concentration | ESLR                               | ppm | ✓ (only in CFE-ML and CFE-Hybrid setups)       | ✓ (only in LT_CFE-Hybrid setup) |

- a. kNDVI (Camps-Valls et al., 2021)
- b. NDWI reference (Gao, 1996)
- c. CIgreen (Gitelson, 2005)
- d. NIRv (Badgley et al., 2017)

Table S2. Machine learning model performance for different model setups. Models were trained using GPP from on DT partitioning.

| Model Setup      | Monthly |       |      | MSC  |      |      | Monthly anomalies |      |      | Cross-site |      |      |
|------------------|---------|-------|------|------|------|------|-------------------|------|------|------------|------|------|
|                  | RMSE    | Bias  | r2   | RMSE | Bias | r2   | RMSE              | Bias | r2   | RMSE       | Bias | r2   |
| ST_Baseline_DT   | 1.84    | -0.04 | 0.75 | 1.46 | 0.02 | 0.81 | 1.20              | 0.00 | 0.11 | 1.01       | 0.03 | 0.69 |
| ST_CFE-ML_DT     | 1.86    | -0.04 | 0.74 | 1.47 | 0.03 | 0.80 | 1.20              | 0.00 | 0.11 | 1.01       | 0.03 | 0.69 |
| ST_CFE-Hybrid_DT | 1.86    | -0.01 | 0.74 | 1.48 | 0.06 | 0.80 | 1.20              | 0.00 | 0.11 | 1.01       | 0.07 | 0.69 |
| LT_Baseline_DT   | 2.04    | -0.08 | 0.69 | 1.69 | 0.03 | 0.74 | 1.24              | 0.00 | 0.04 | 1.18       | 0.04 | 0.58 |
| LT_CFE-Hybrid_DT | 2.02    | -0.03 | 0.69 | 1.66 | 0.08 | 0.75 | 1.23              | 0.00 | 0.06 | 1.15       | 0.08 | 0.60 |

Figure S1. Global patterns of mean annual GPP from CEDAR-GPP product and other GPP datasets.

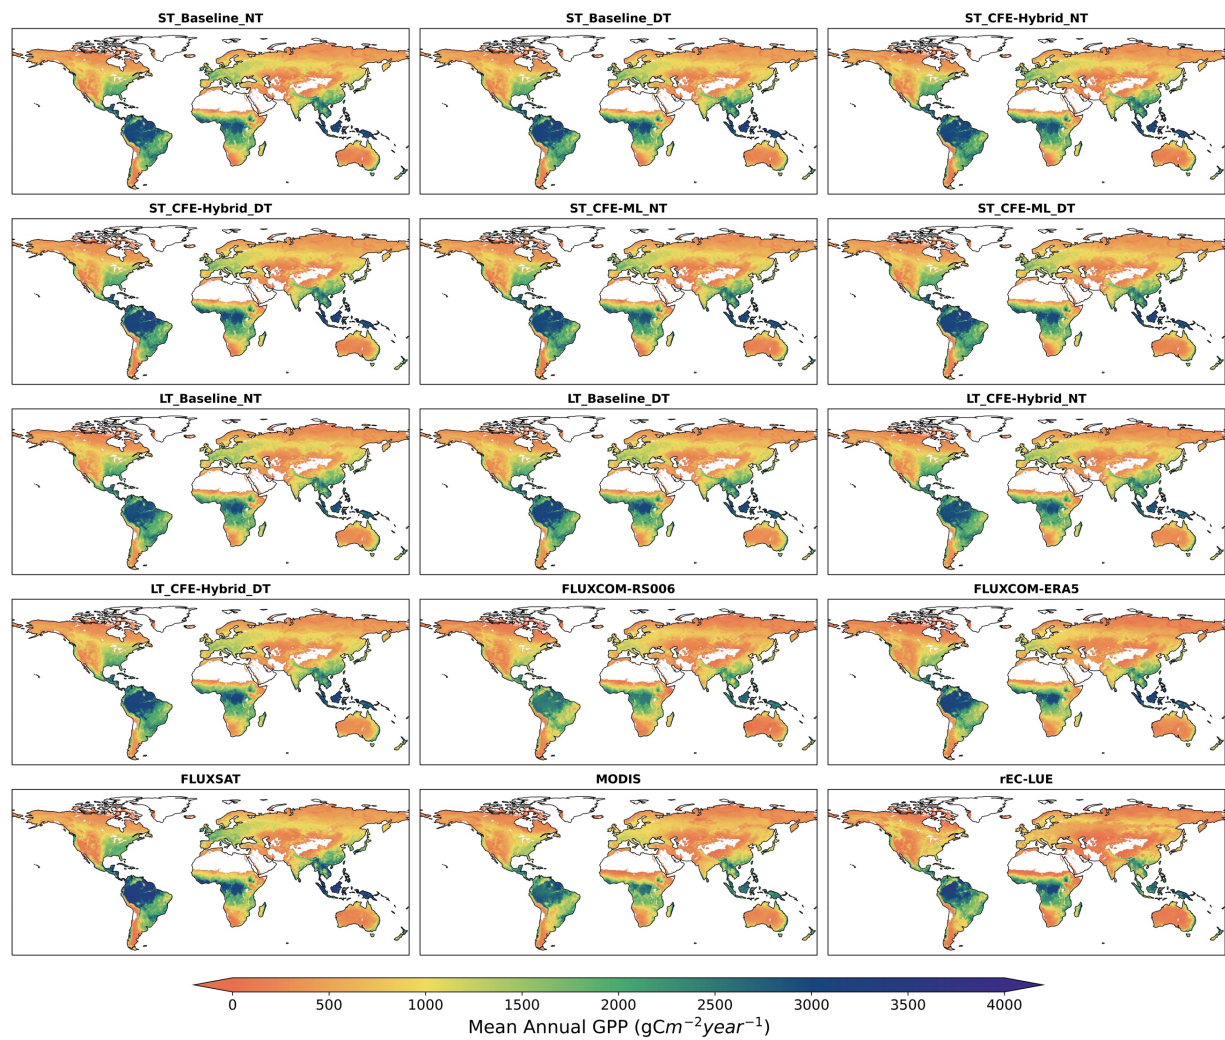

Figure S2. GPP mean seasonal cycle from CEDAR-GPP short-term (a) and long-term (b) datasets.

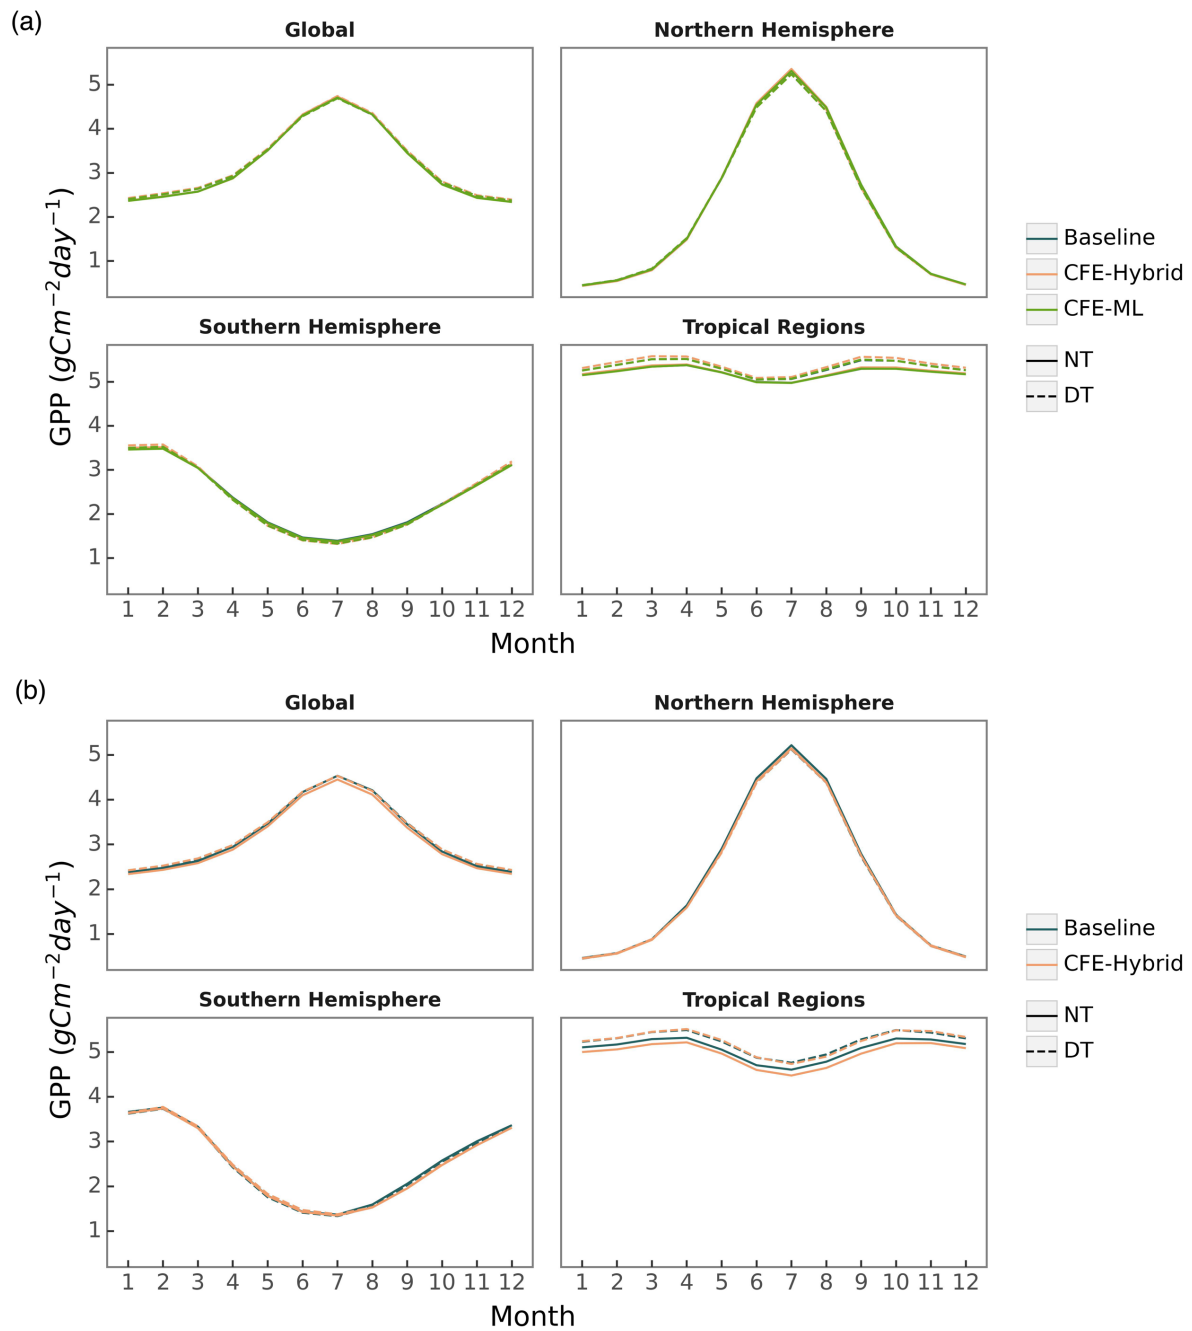

Figure S3. Spatial patterns of GPP interannual variability from ten CEDAR-GPP extracted from 2001 to 2018.

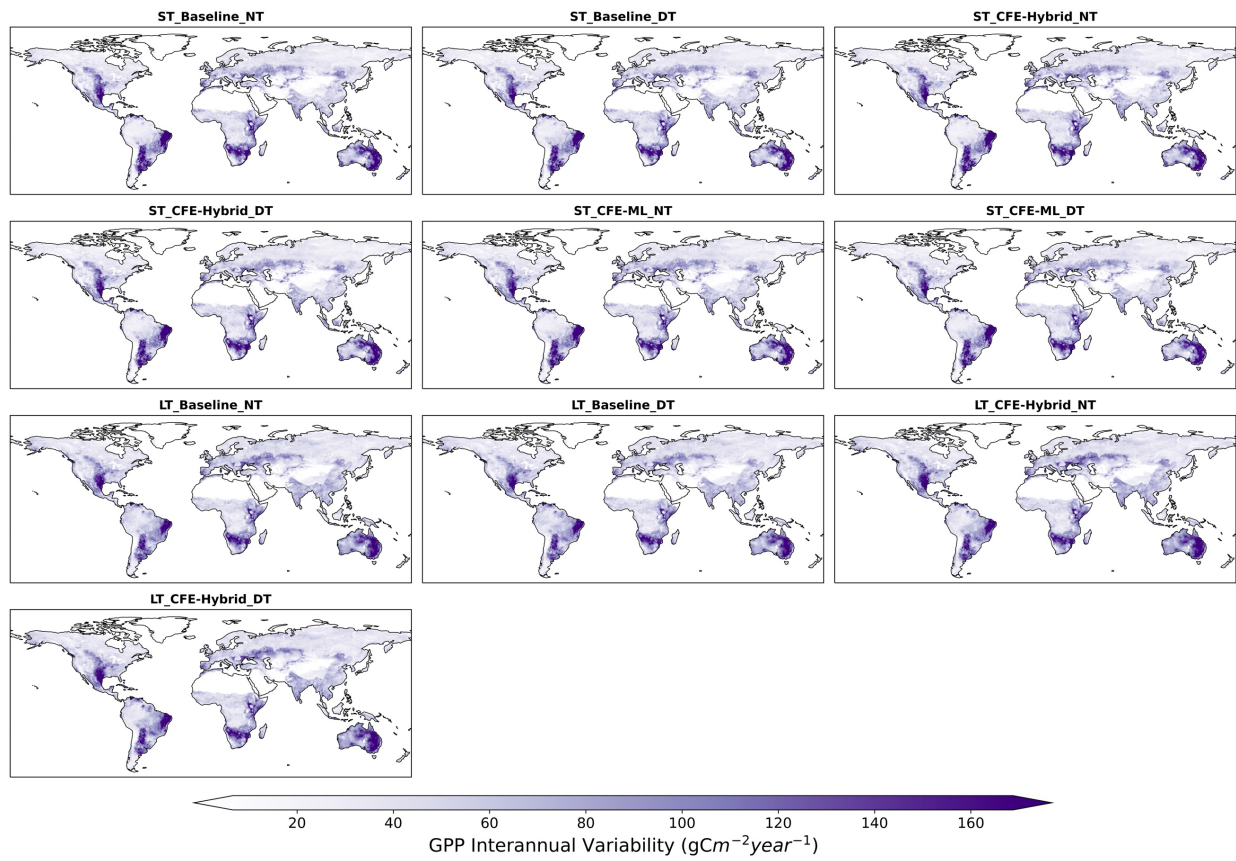

Figure S4. Global pattern of GPP annual trend from ten CEDAR-GPP products. Hatched areas indicate the GPP trend that is statistically significant at  $p < 0.05$  level under the Mann-Kendal test.

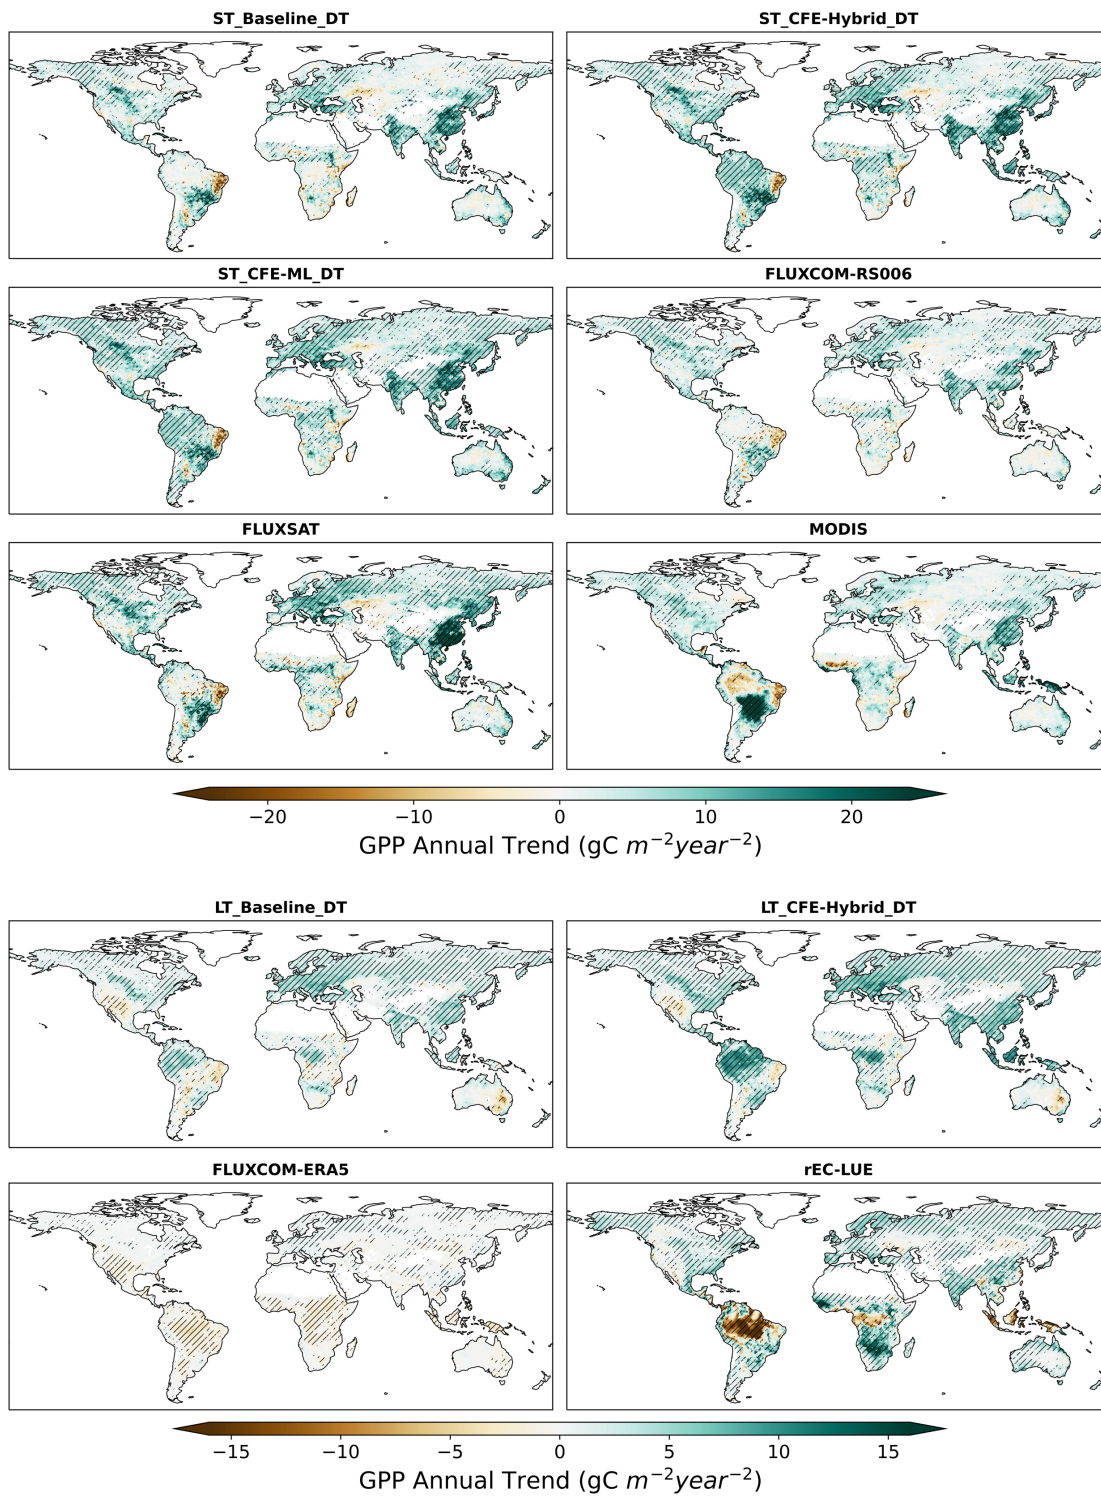

Figure S5. Comparison of global annual GPP trend over 1982-2000 and over 2001-2020 in CEDAR-GPP, FLUXCOM-ERA5, and rEC-LUE.

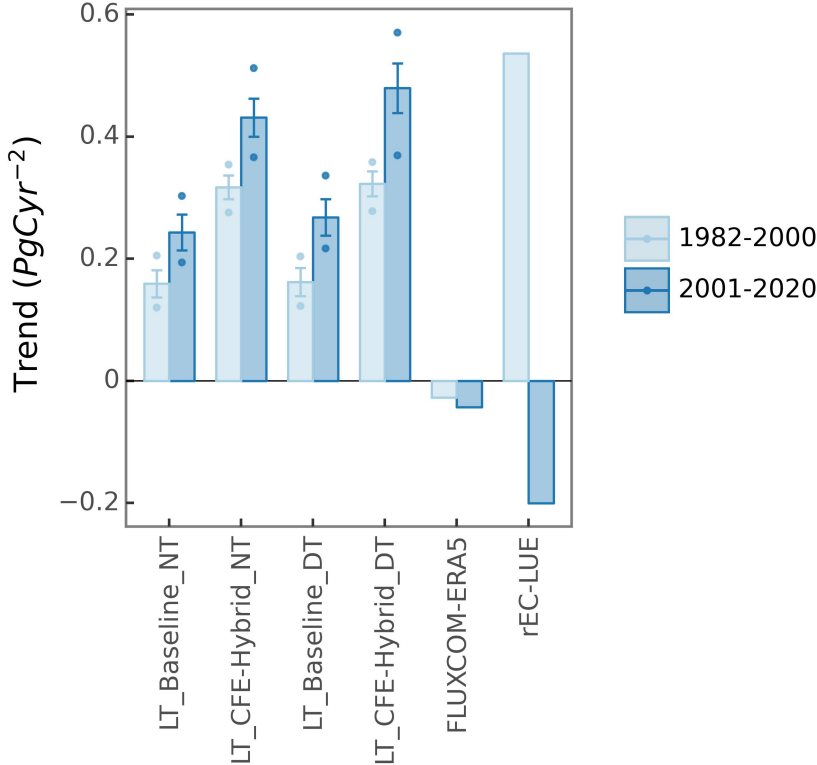

## SI References

Badgley, G., Field, C. B., and Berry, J. A.: Canopy near-infrared reflectance and terrestrial photosynthesis, *Science Advances*, 3, 1–6, <https://doi.org/10.1126/sciadv.1602244>, 2017.

Camps-Valls, G., Campos-Taberner, M., Moreno-Martínez, Á., Walther, S., Duveiller, G., Cescatti, A., Mahecha, M. D., Muñoz-Marí, J., García-Haro, F. J., Guanter, L., Jung, M., Gamon, J. A., Reichstein, M., and Running, S. W.: A unified vegetation index for quantifying the terrestrial biosphere, *Science Advances*, 7, eabc7447, <https://doi.org/10.1126/sciadv.abc7447>, 2021.

Gao, B. C.: NDWI - A normalized difference water index for remote sensing of vegetation liquid water from space, *Remote Sensing of Environment*, 58, 257–266, [https://doi.org/10.1016/S0034-4257\(96\)00067-3](https://doi.org/10.1016/S0034-4257(96)00067-3), 1996.

Gitelson, A. a.: Remote estimation of canopy chlorophyll content in crops, *Geophysical Research Letters*, 32, L08403, <https://doi.org/10.1029/2005GL022688>, 2005.
